# Supplementary material for: Design, characterization and cellular uptake studies of fluorescence-labeled prototypic cathepsin inhibitors
Source: Royal Society of Chemistry journal article supplement (doi:10.1039/c5ob01613d), 2015-01-01

## SUPPORTING INFORMATION

### **Design, Characterization and Cellular Uptake Studies of Fluorescence-Labeled Prototypic Cathepsin Inhibitors**

Franziska Kohl, Janina Schmitz, Norbert Furtmann, Anna-Christina Schulz-Fincke, Matthias D. Mertens, Jim Küppers, Marcel Benkhoff, Edda Tobiasch, Ulrike Bartz, Jürgen Bajorath, Marit Stirnberg, and Michael Gütschow\*

#### **Table of Contents**

|                                                                |     |
|----------------------------------------------------------------|-----|
| Inhibition Assays .....                                        | S2  |
| Molecular Docking .....                                        | S4  |
| UV and Fluorescence Spectra .....                              | S8  |
| Cell Viability after Treatment with Probe <b>7</b> .....       | S10 |
| Experimental HPLC Procedure for log $D_{7,4}$ Estimation ..... | S11 |
| References .....                                               | S14 |
| $^{13}\text{C}$ and $^1\text{H}$ NMR Spectra .....             | S15 |

## Inhibition Assays

**Cathepsin L inhibition assay.**<sup>1</sup> Human isolated cathepsin L (Enzo Life Sciences, Lörrach, Germany) was assayed spectrophotometrically at 405 nm and at 37 °C. The reactions were followed over 20 min. Assay buffer was 100 mM sodium phosphate buffer pH 6.0, 100 mM NaCl, 5 mM EDTA, and 0.01% Brij 35. An enzyme stock solution of 135 µg/mL in 20 mM malonate buffer pH 5.5, 400 mM NaCl, and 1 mM EDTA was diluted 1:100 with assay buffer containing 5 mM DTT and incubated for 30 min at 37 °C. A 10 mM stock solution of the chromogenic substrate Z-Phe-Arg-pNA was prepared in DMSO. The final concentration of DMSO was 2%, and the final concentration of the substrate was 100 µM (= 5.88  $K_m$ ). The assay was performed with a final concentration of 54 ng/mL of cathepsin L. Into a cuvette containing 940 µL assay buffer, inhibitor solution and DMSO in a total volume of 10 µL, and 10 µL of the substrate solution were added and thoroughly mixed. The reaction was initiated by adding 40 µL of the cathepsin L solution.

**Cathepsin S inhibition assay.**<sup>2</sup> Human recombinant cathepsin S (Enzo Life Sciences, Lörrach, Germany) was assayed fluorometrically. The wavelength for excitation was 360 nm and for emission 440 nm. The reactions were followed at 25 °C over 20 min. Assay buffer was 100 mM sodium phosphate buffer pH 6.0, 100 mM NaCl, 5 mM EDTA, and 0.01% Brij 35. An enzyme stock solution of 70 µg/mL in 100 mM MES buffer, pH 6.5, 1 mM EDTA, 50 mM L-cysteine, 10 mM dithiothreitol (DTT), 0.5% Triton X-100 and 30% glycerol was diluted 1:100 with a 50 mM sodium phosphate buffer pH 6.5, 50 mM NaCl, 2 mM EDTA, 0.01% Triton X-100 and 5 mM DTT and incubated for 60 min at 37 °C. A 10 mM stock solution of the fluorogenic substrate Z-Phe-Arg-AMC was prepared in DMSO. The assay was performed with a final substrate concentration of 40 µM (= 0.74  $K_m$ ), a final concentration of 42 ng/mL of cathepsin S, and a final DMSO concentration of 2%. Into a cuvette containing 920 µL assay buffer, inhibitor solution and DMSO in a total volume of 16 µL, and 4 µL of the substrate solution were added and thoroughly mixed. The reaction was initiated by adding 60 µL of the cathepsin S solution.

**Cathepsin K inhibition assay.**<sup>1</sup> Human recombinant cathepsin K (Enzo Life Sciences, Lörrach, Germany) was assayed fluorometrically. The wavelength for excitation was 360 nm and for emission 440 nm. The reactions were followed at 25 °C over 20 min. An enzyme stock solution of 23 µg/mL in 50 mM sodium acetate pH 5.5, 50 mM NaCl, 0.5 mM EDTA, 5 mM DTT was diluted 1:100 with assay buffer (100 mM sodium citrate pH 5.0, 100 mM NaCl, 1 mM EDTA, 0.01% CHAPS) containing 5 mM DTT and incubated for 30 min at 37 °C. A 10 mM stock solution of the fluorogenic substrate Z-Leu-Arg-AMC was prepared in DMSO. The final concentration of DMSO was 2%, and the final concentration of the substrate was 40 µM (= 13.3  $K_m$ ). The assay was performed with a final concentration of 5 ng/mL of cathepsin K. Into a cuvette containing 960 µL assay buffer, inhibitor solution and DMSO in a total volume of 16 µL, and 4 µL of the substrate solution were added and thoroughly mixed. The reaction was initiated by adding 20 µL of the cathepsin K solution.

**Cathepsin B inhibition assay.**<sup>1</sup> Human isolated cathepsin B (Calbiochem, Darmstadt, Germany) was assayed spectrophotometrically at 405 nm and at 37 °C. The reactions were followed over 20 min. Assay buffer was 100 mM sodium phosphate buffer pH 6.0, 100 mM NaCl, 5 mM EDTA, 0.01% Brij 35. An enzyme stock solution of 1.81 mg/mL in 20 mM sodium acetate buffer pH 5.0, 1 mM EDTA was diluted 1:500 with assay buffer containing 5 mM DTT and incubated for 30 min at 37 °C. A 100 mM stock solution of the chromogenic substrate Z-Arg-Arg-pNA was prepared in DMSO. The final concentration of DMSO was 2% and the final concentration of the substrate was 500 µM (= 0.45  $K_m$ ). The assay was performed with a final concentration of 72 ng/mL of cathepsin B. Into a cuvette containing 960 µL assay buffer, inhibitor solution and DMSO in a total volume of 15 µL, and 5 µL of the substrate solution were added and thoroughly mixed. The reaction was initiated by adding 20 µL of the cathepsin B solution.

## Molecular Docking

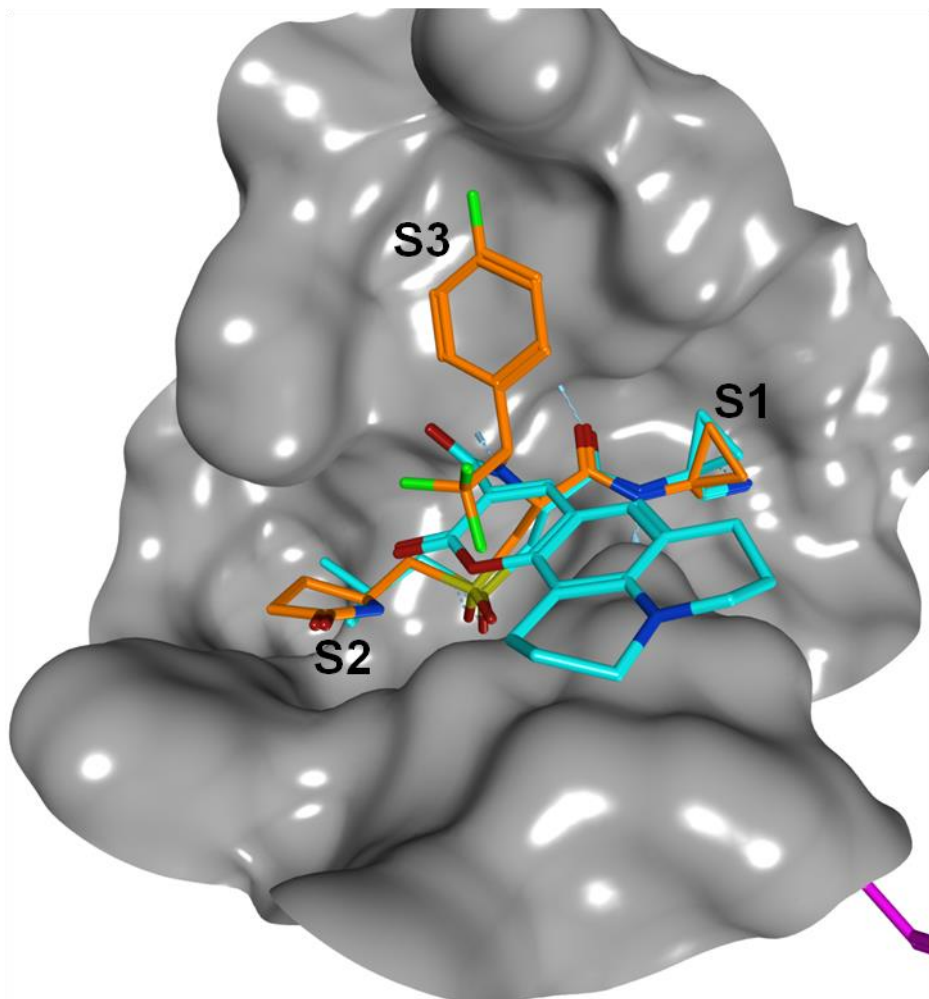

**Figure S1. Overlay cathepsin S.** Shown is an overlay of the predicted binding mode of probe **6** (cyan) and the co-crystallized nitrile inhibitor (orange) within the active site of cathepsin S (PDB ID 2FQ9)<sup>3</sup> in grey surface representation.

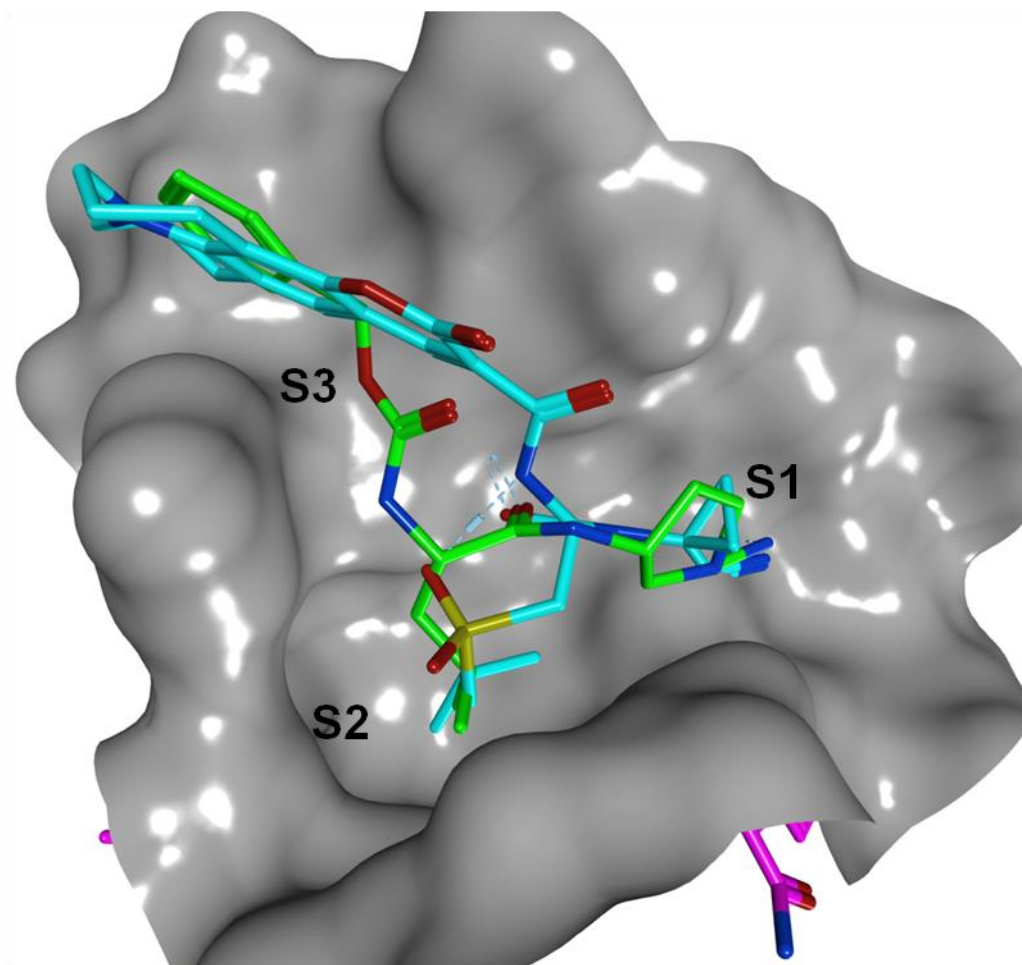

**Figure S2. Overlay cathepsin K.** An overlay of the predicted binding mode of probe **6** (cyan) and the crystallographic cyanamide inhibitor (green) within the active site of cathepsin K (PDB ID 1YK7)<sup>4</sup> in grey surface representation is depicted.

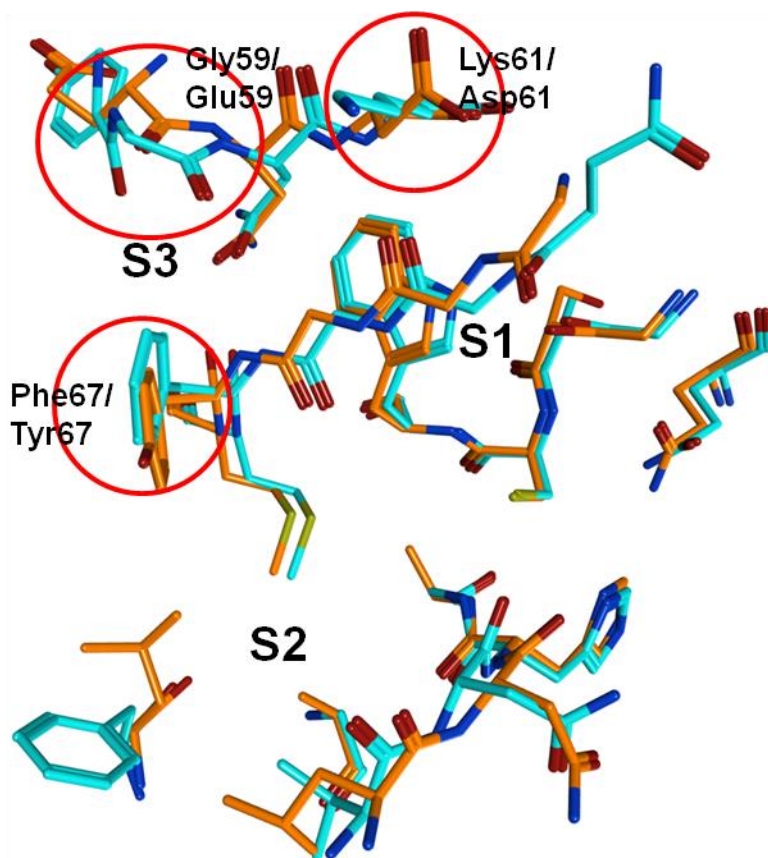

**Figure S3. Active site comparison.** An overlay of the active site residues of cathepsin S (cyan) and cathepsin K (orange) is depicted. Residues responsible for the different size of the S3 pockets are circled in red.

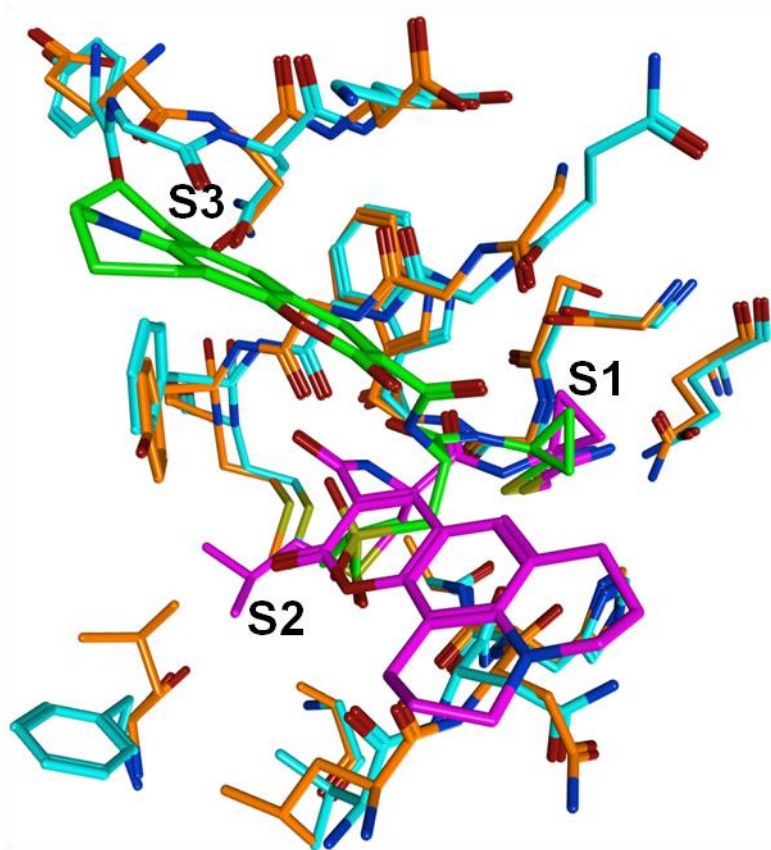

**Figure S4. Active site comparison with inhibitor.** An overlay of the active site residues of cathepsin S (cyan) and cathepsin K (orange) is depicted. Putative binding modes of probe **6** within the active sites of cathepsin S and K are shown in magenta and green, respectively.

## UV and Fluorescence Spectra

The UV- and fluorescence spectra were recorded in CH<sub>2</sub>Cl<sub>2</sub>, MeOH, H<sub>2</sub>O, (1% DMSO) and PBS (5% DMSO). A 10 mM stock solution of compound **6** in DMSO was diluted accordingly. The UV spectra were recorded at a final compound concentration of 10 μM on a Varian Cary 50 Bio apparatus. Fluorescence spectra were recorded on a flx-Xenius, Safas Monaco, spectrofluorometer at a final compound concentration of 1 μM.

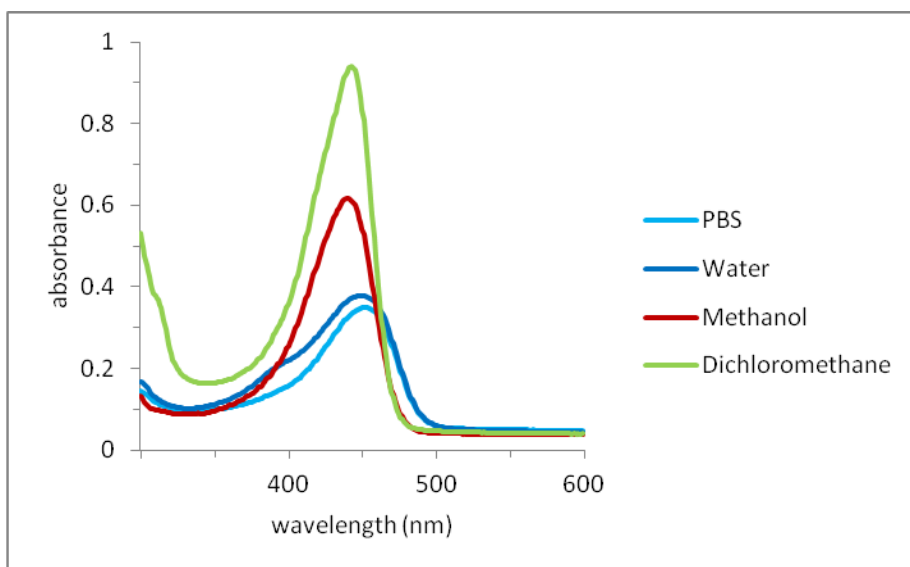

**Figure S5.** UV spectra of compound **6** (10 μM).

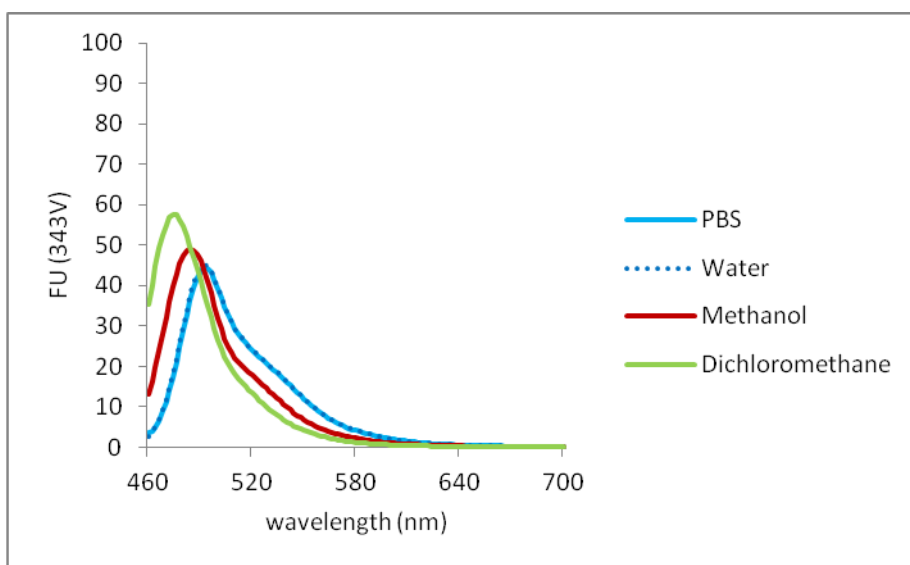

**Figure S6.** Fluorescence spectra of compound **6** (1 μM, λ<sub>ex</sub> 450 nm). A PMT value of 343 V was adjusted.



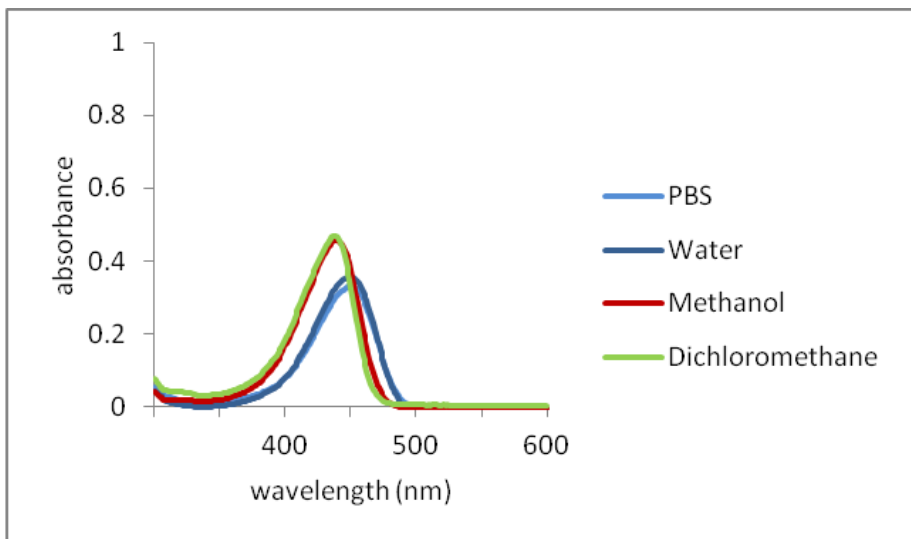

**Figure S7.** UV spectra of compound **7** (10 μM).

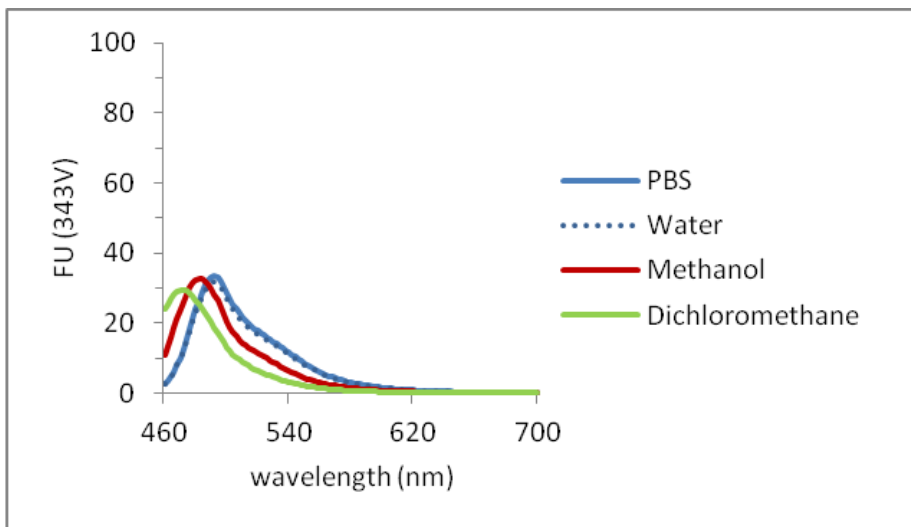

**Figure S8.** Fluorescence spectra of compound **7** (1 μM,  $\lambda_{\text{ex}}$  450 nm). A PMT value of 343 V was adjusted.

## Cell Viability after Treatment with Probe 7

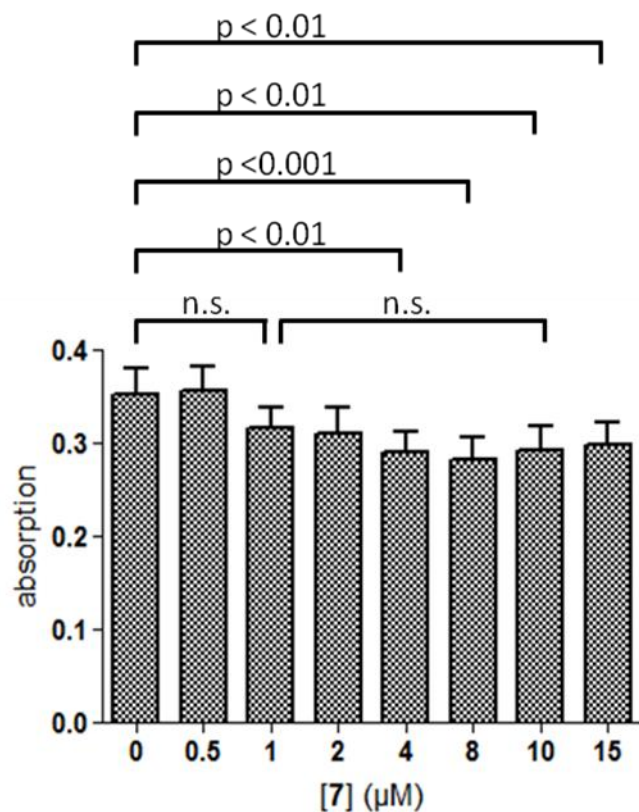

**Figure S9. Results of the MTT assay for probe 7.** HEK 293 cells were incubated for 3 h with compound 7 at different concentrations. Data of five independent experiments are presented as means  $\pm$  SD. ANOVA revealed significant differences of the means between untreated cells and cells treated with 4, 8, 10 and 15  $\mu$ M. The p values were calculated by using post-hoc analysis (Tukey's test; 'n.s.' means 'not significant'). Only statistically significant differences are indicated except for compound concentrations of 1  $\mu$ M and 10  $\mu$ M, which have been used in cell-based uptake experiments.

## Experimental HPLC Procedure for $\log D_{7.4}$ Estimation

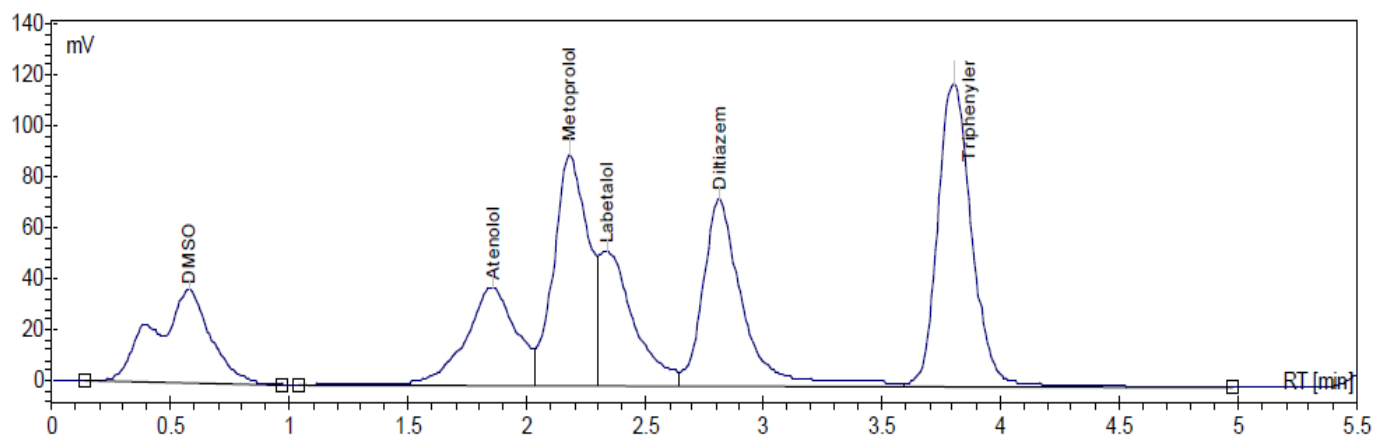

**Figure S10.** HPLC chromatogram of a mixture of five calibration compounds (atenolol 1.5 mg/mL, metoprolol tartrate 4.0 mg/mL, labetalol hydrochloride 0.12 mg/mL, diltiazem hydrochloride 0.075 mg/mL and triphenylene 0.01 mg/mL).

**Table S1.** Obtained  $t_R$  values of the calibration compounds and  $\log D_{7.4}$  values

| compound     | run a<br>$t_R$ (min) | run b<br>$t_R$ (min) | run c<br>$t_R$ (min) | mean<br>$t_R$ (min) | lit. <sup>5</sup> $\log D_{7.4}$ | $\log D_{7.4}$ (from $t_R$ ) |
|--------------|----------------------|----------------------|----------------------|---------------------|----------------------------------|------------------------------|
| atenolol     | 1.858                | 1.842                | 1.850                | 1.850               | -1.38                            | -1.03                        |
| metoprolol   | 2.183                | 2.175                | 2.175                | 2.178               | -0.06                            | 0.11                         |
| labetalol    | 2.342                | 2.333                | 2.333                | 2.336               | 1.07                             | 0.66                         |
| diltiazem    | 2.817                | 2.808                | 2.808                | 2.811               | 2.70                             | 2.32                         |
| triphenylene | 3.800                | 3.792                | 3.792                | 3.795               | 5.49                             | 5.75                         |

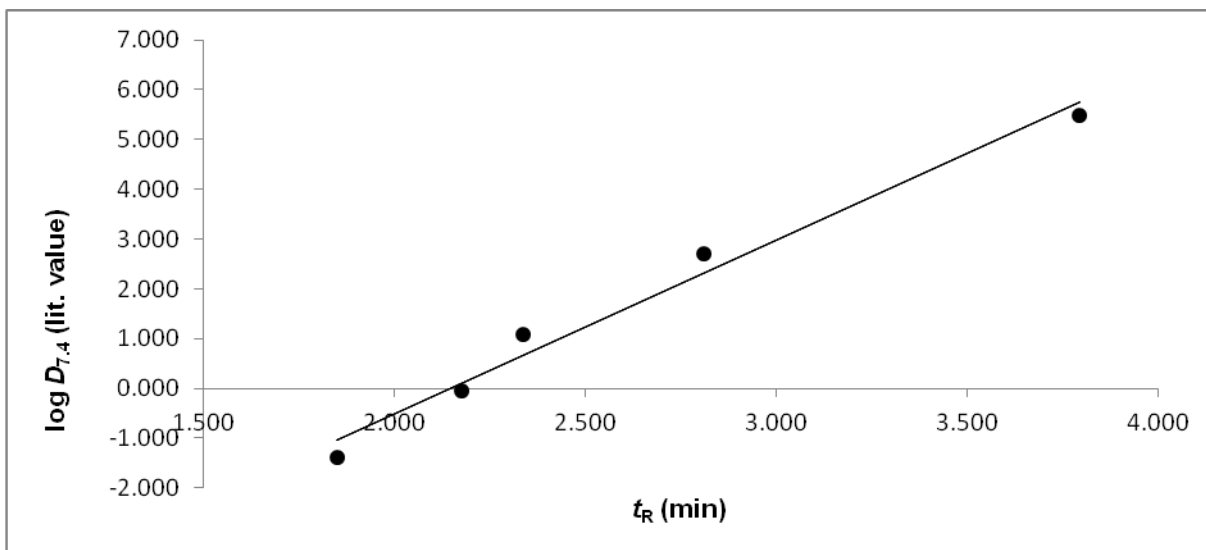

**Figure S11.** Calibration line using the standards listed in Table S1 for calculating  $\log D_{7.4}$ . Linear regression gave the equation  $\log D_{7.4} = 3.485 t_R - 7.476$  and  $R^2 = 0.981$ .

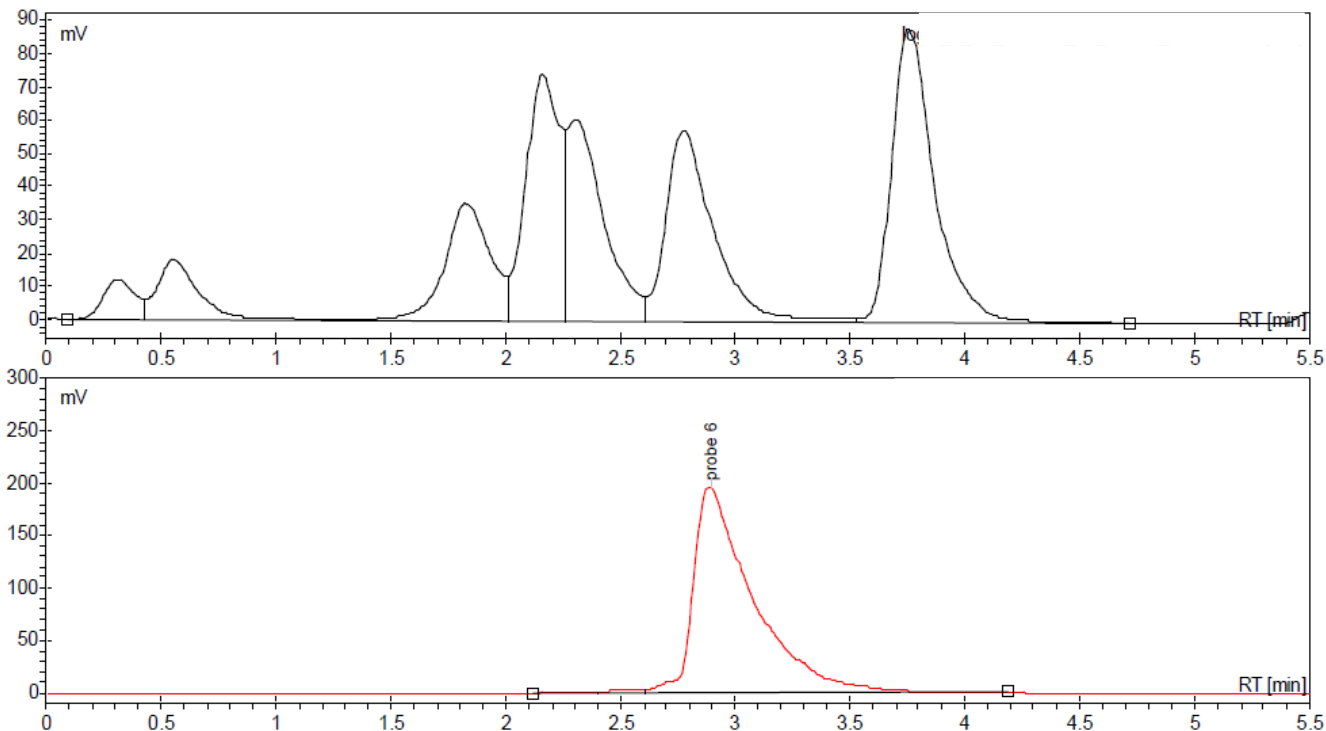

**Figure S12.** HPLC chromatogram of a mixture of five calibration compounds spiked with probe **6** (top: UV detection, bottom: fluorescence detection). Concentrations of the calibration compounds were as in Figure S10. The concentration of **6** was 0.014 mg/mL (25  $\mu$ M). Probe **6** was detected by means of fluorescence detection (bottom). The mean retention time  $t_R$  was 2.906 min (three separate runs). According to the equation  $\log D_{7.4} = 3.485 t_R - 7.476$ , a  $\log D_{7.4}$  value of 2.65 was calculated.

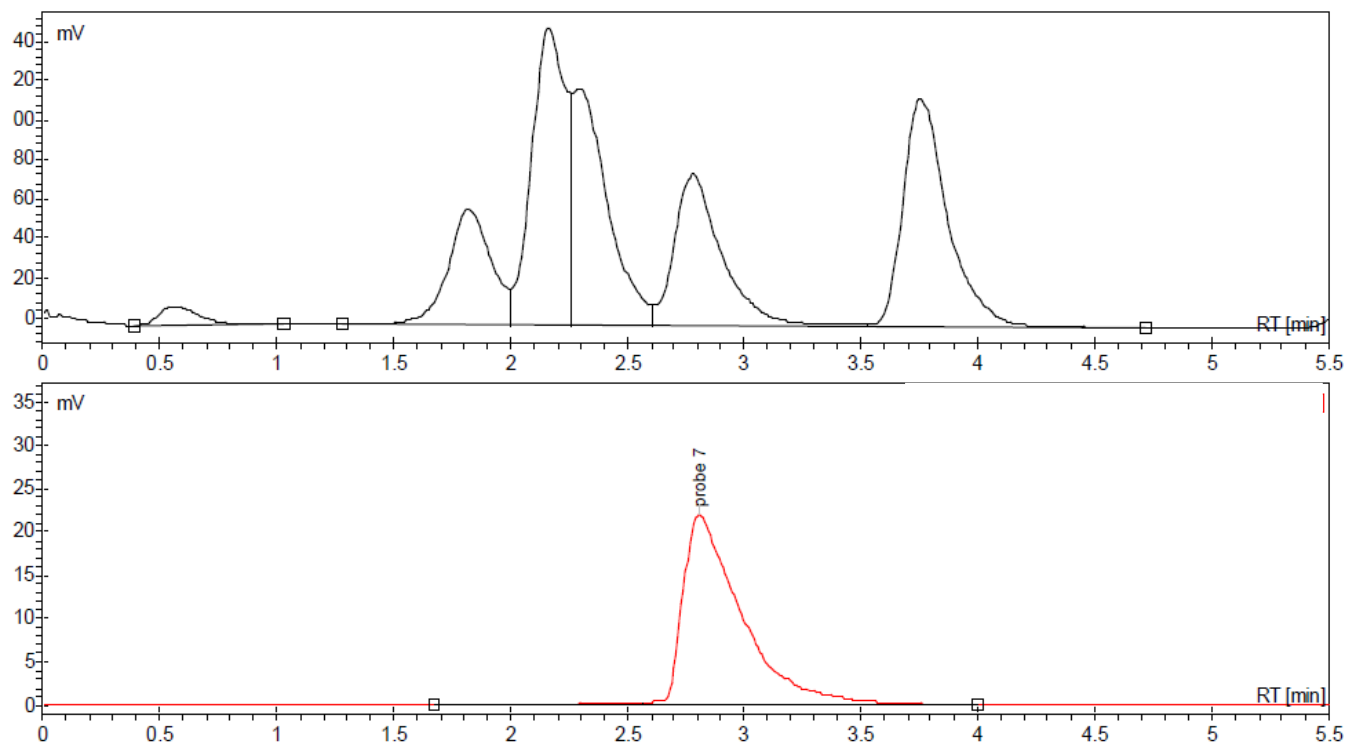

**Figure S13.** HPLC chromatogram of a mixture of five calibration compounds spiked with probe **7** (top: UV detection, bottom: fluorescence detection). Concentrations of the calibration compounds were as in Figure S10. The concentration of **7** was 0.0017 mg/mL (2.5  $\mu$ M). Probe **7** was detected by means of fluorescence detection (bottom). The mean retention time  $t_R$  was 2.805 min (three separate runs). According to the equation  $\log D_{7,4} = 3.485 t_R - 7.476$ , a  $\log D_{7,4}$  value of 2.30 was calculated.

## References

- (1) Frizler, M.; Lohr, F.; Furtmann, N.; Kläs, J.; Gütschow, M. Structural optimization of azadipeptide nitriles strongly increases association rates and allows the development of selective cathepsin inhibitors. *J. Med. Chem.* **2011**, *54*, 396-400.
- (2) Mertens, M. D.; Schmitz, J.; Horn, M.; Furtmann, N.; Bajorath, J.; Mareš, M.; Gütschow, M. A coumarin-labeled vinyl sulfone as tripeptidomimetic activity-based probe for cysteine cathepsins. *ChemBioChem* **2014**, *15*, 955-959.
- (3) Somoza, J. R. Cathepsin S with nitrile inhibitor. Unpublished, RCSB Protein Data Bank release March 21, 2006; PDB-ID 2FQ9.
- (4) Deaton, D. N.; Hassell, A. M.; McFadyen, R. B.; Miller, A. B.; Miller, L. R.; Shewchuck, L. M.; Tavares, F. X.; Willard, D. H.; Wright, L. L. Novel and potent cyclic cyanamide-based cathepsin K inhibitors. *Bioorg. Med. Chem. Lett.* **2005**, *15*, 1815-1819.
- (5) Kerns, E. H.; Di, L.; Petusky, S.; Kleintop, T.; Huryn, D.; McConnell, O.; Carter, G. Pharmaceutical profiling method for lipophilicity and integrity using liquid chromatography-mass spectrometry. *J. Chromatogr. B, Analyt. Technol. Biomed. Life Sci.* **2003**, *791*, 381-388.

# $^{13}\text{C}$ and $^1\text{H}$ NMR Spectra

## (*R*)-*N*-(*tert*-Butyloxycarbonyl)-*S*-(*isobutyl*)cysteinylsulfone-1-aminocyclopropanecarbonitrile (11)

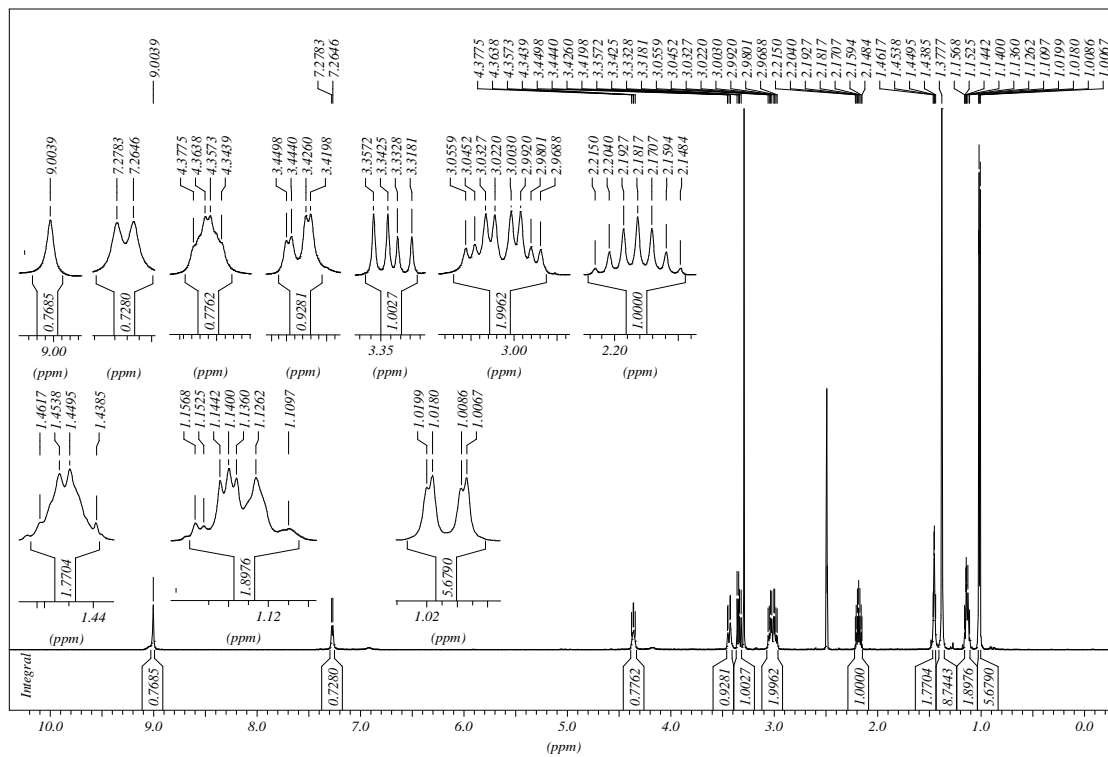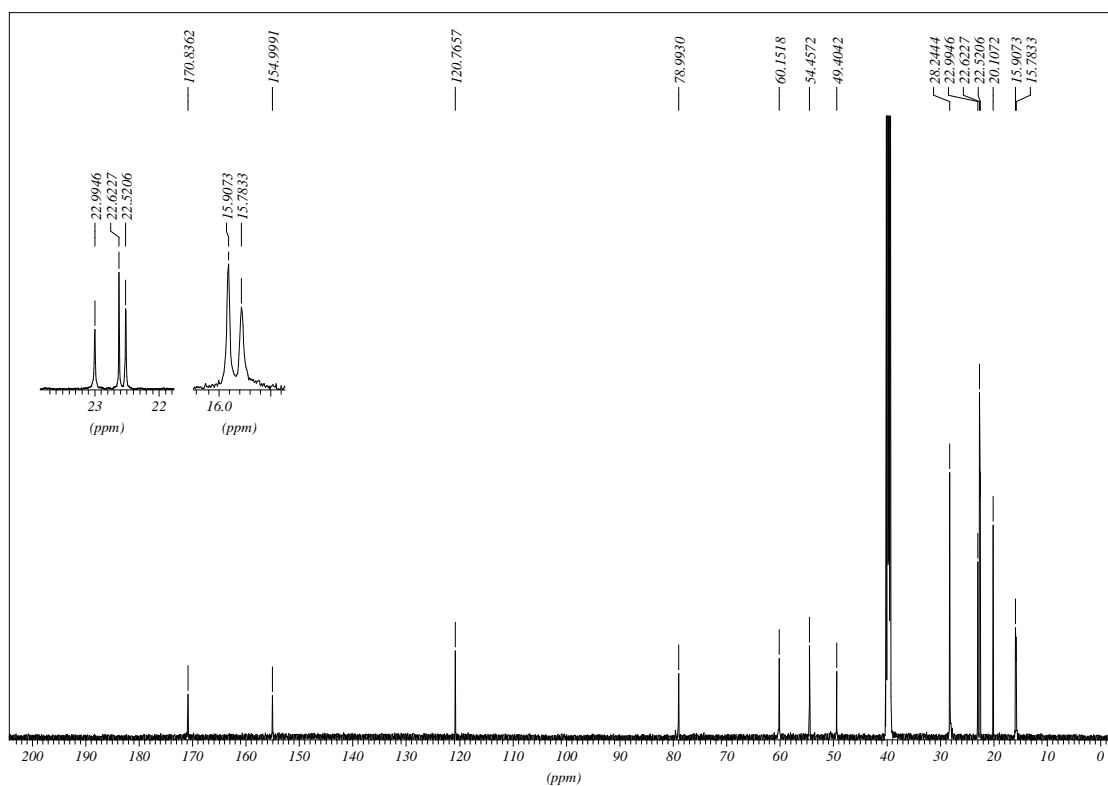



**(R)-S-(Isobutyl)cysteinylsulfone-1-aminocyclopropanecarbonitrile methanesulfonate (12)**

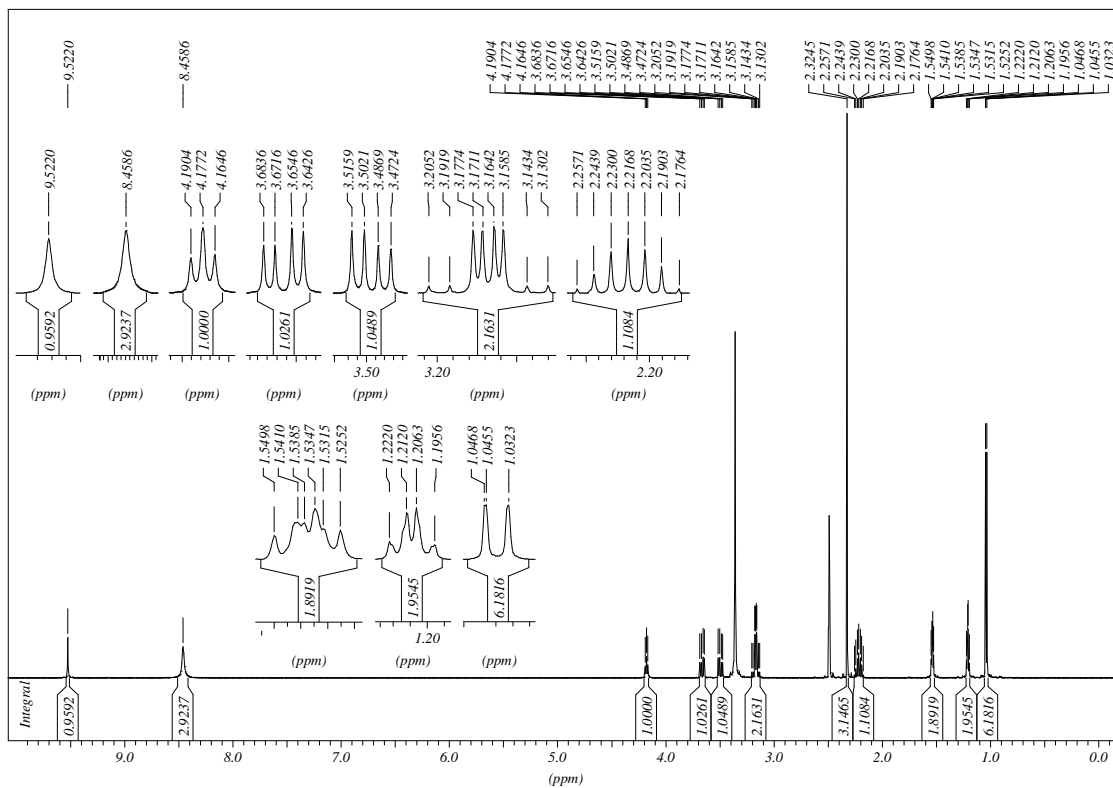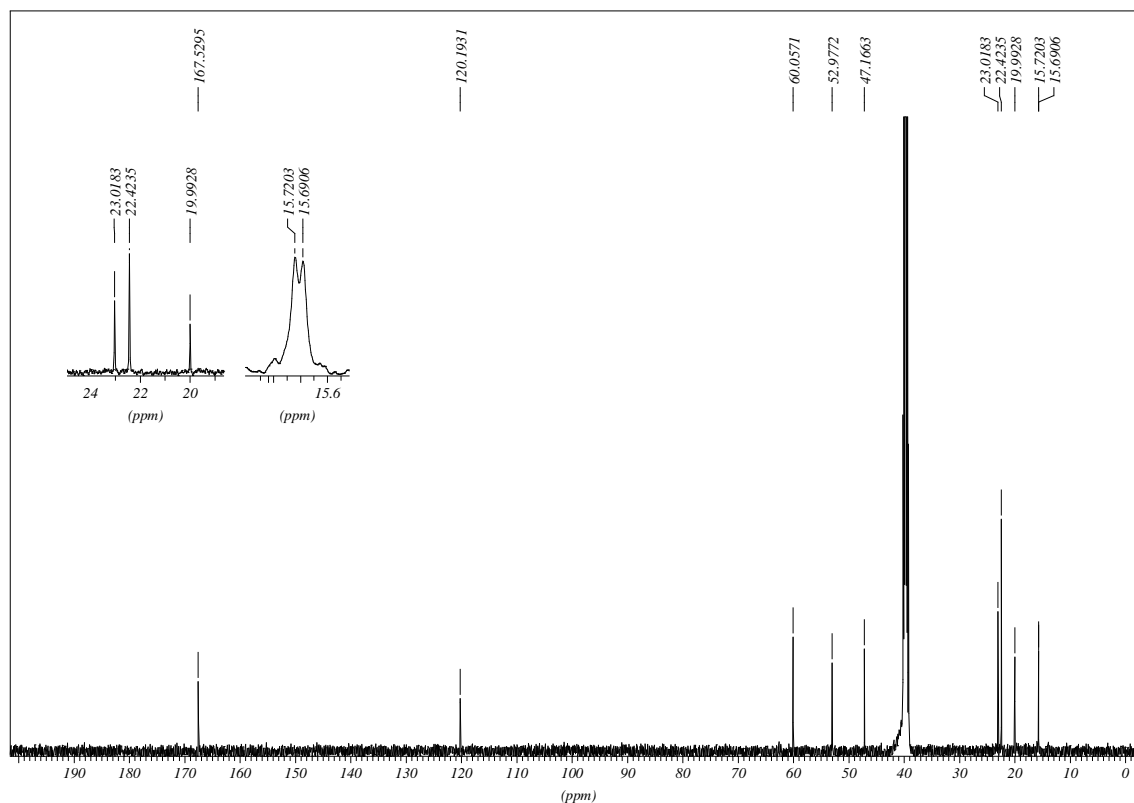

**2,3,6,7-Tetrahydro-11-oxo-1*H*,5*H*,11*H*-[1]benzopyrano-[6,7,8-*ij*]quinolizine-10-carboxylic acid (14)**

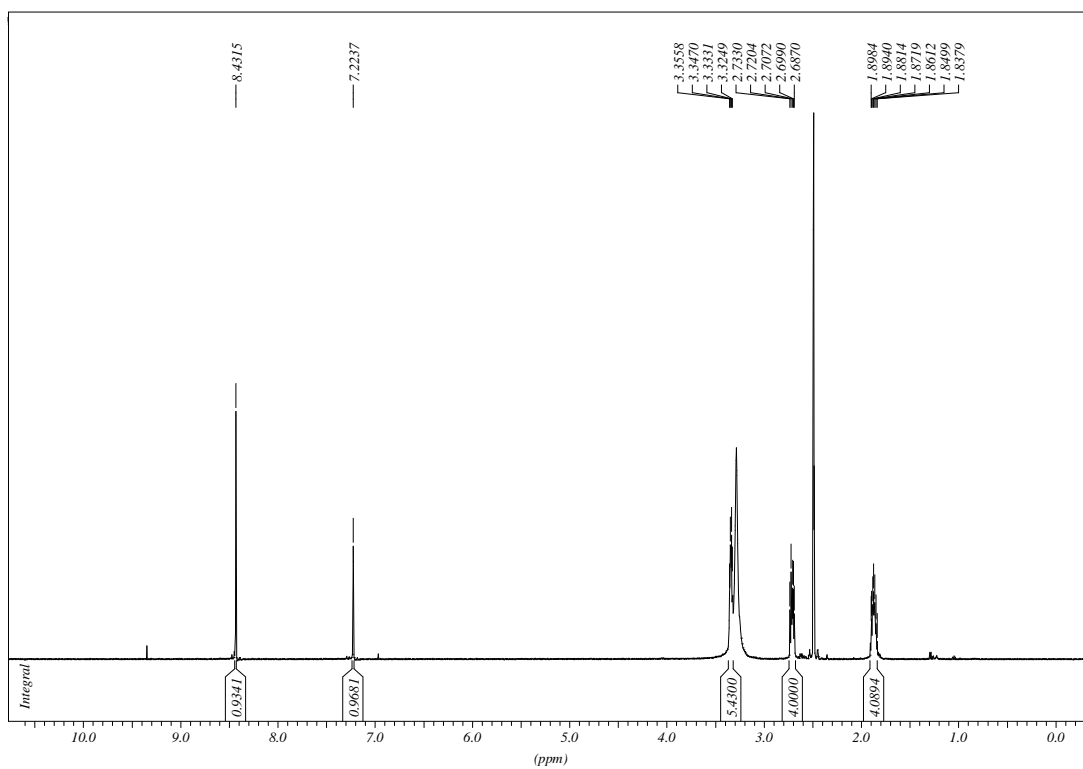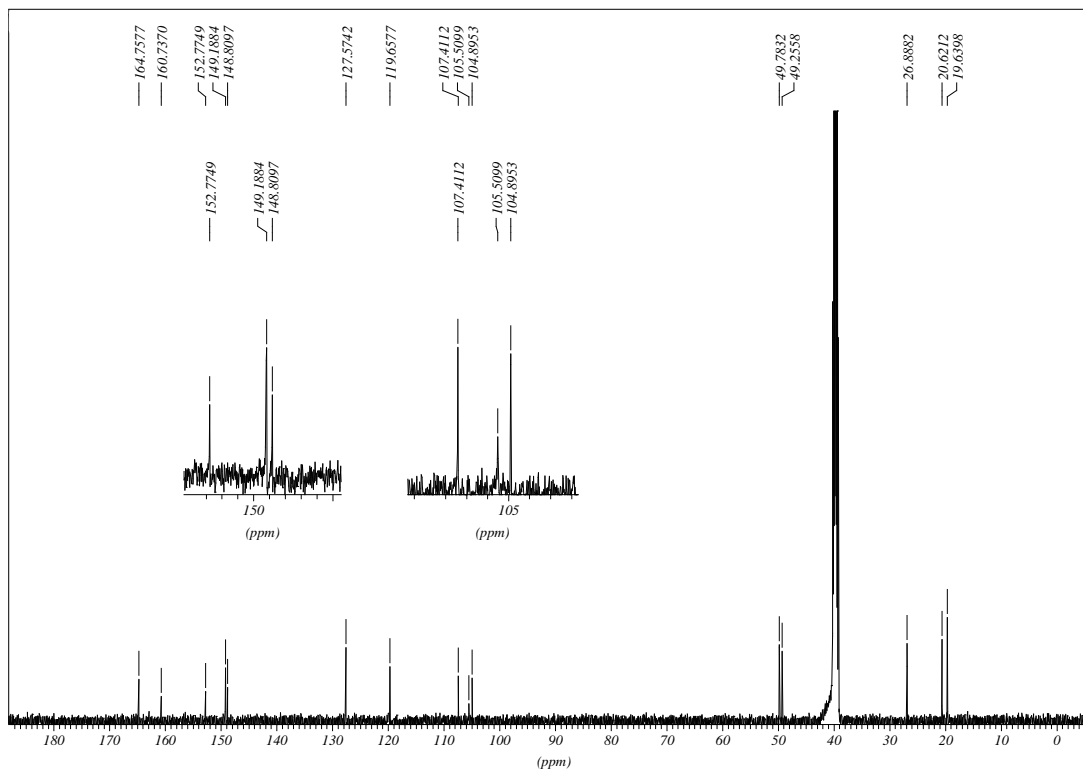





***N*-(Benzyloxycarbonyl)-2-(2-(2-aminoethoxy)ethoxy)acetate *tert*-butyl ester (17)**

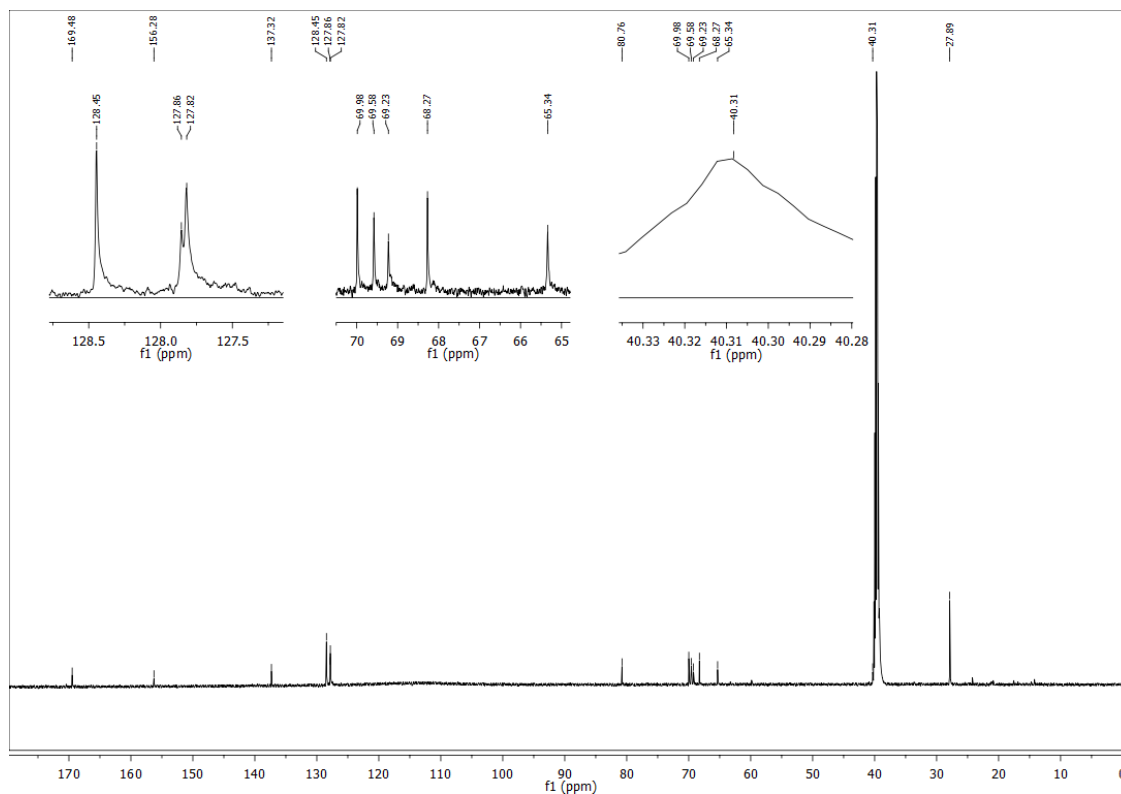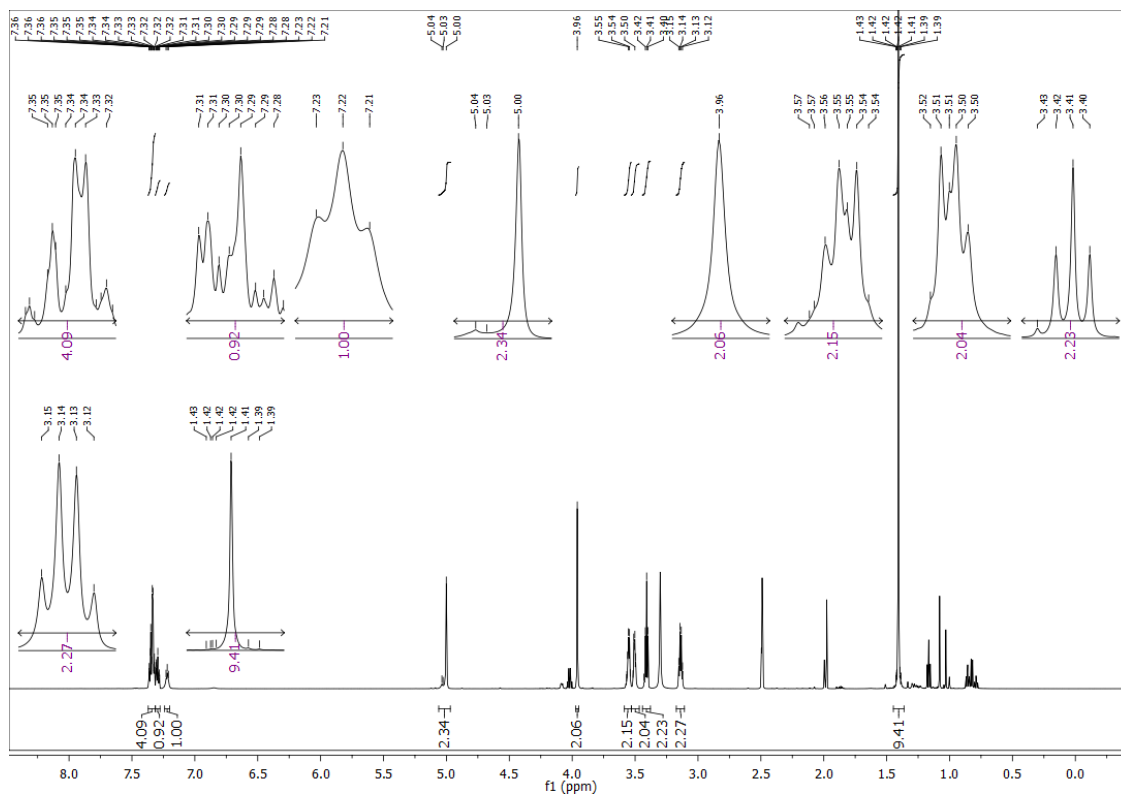

**tert-Butyl 2-(2-(2-aminoethoxy)ethoxy)acetate (18)**

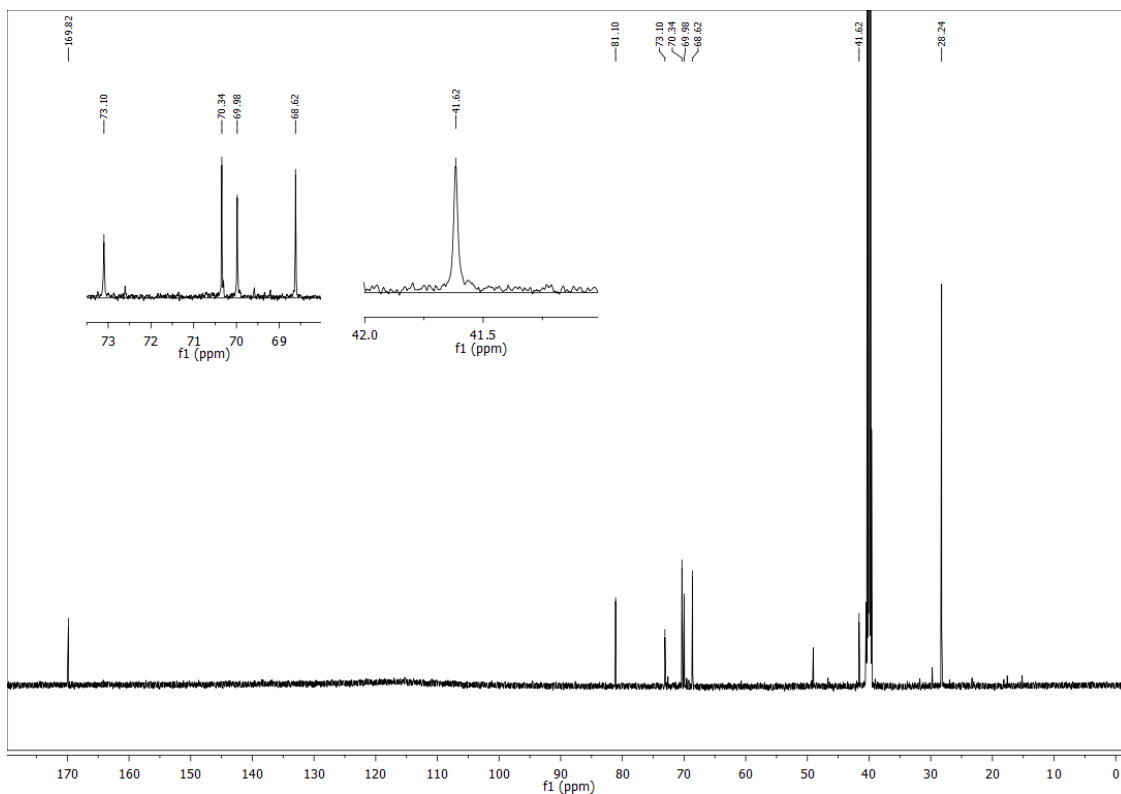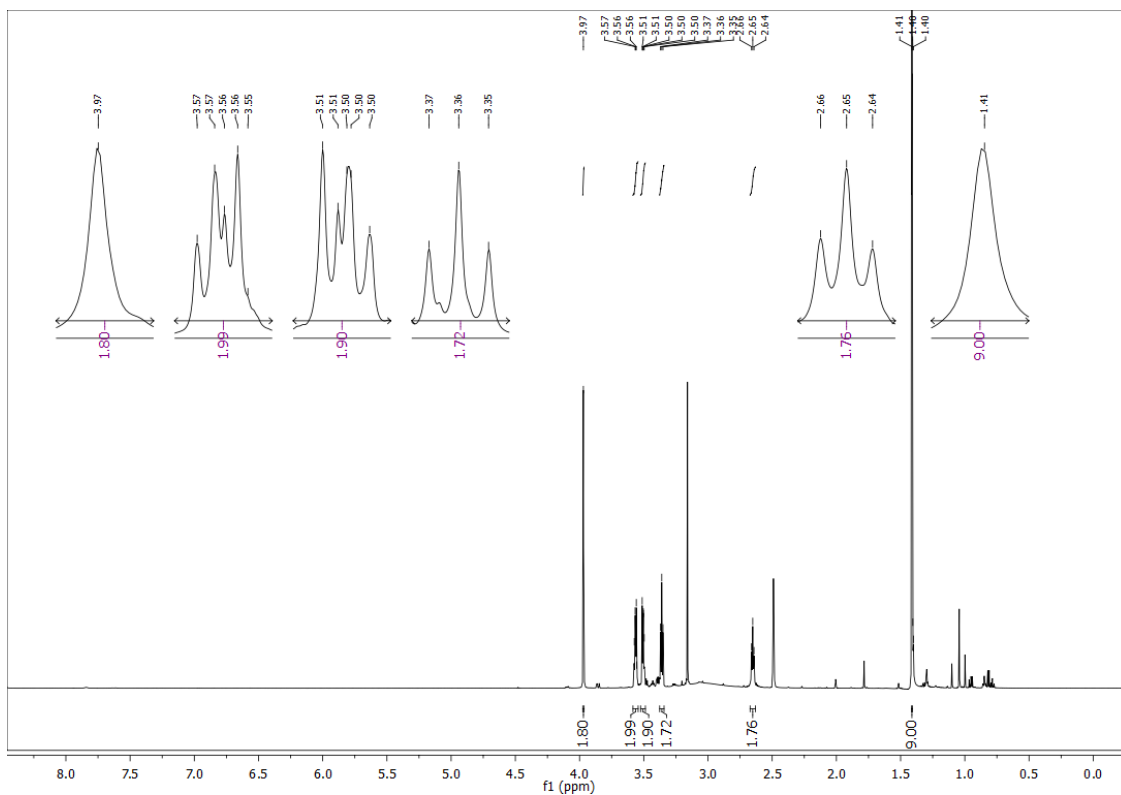



**(R)-N-[N-[(2,3,6,7-Tetrahydro-11-oxo-1*H*,5*H*,11*H*-[1]benzopyrano-[6,7,8-*ij*]quinolizin-10-yl)carbonyl]-2-(2-(2-aminoethoxy)ethoxy)acetyl]-S-(isobutyl)cysteinylsulfone-1-aminocyclopropanecarbonitrile (7)**

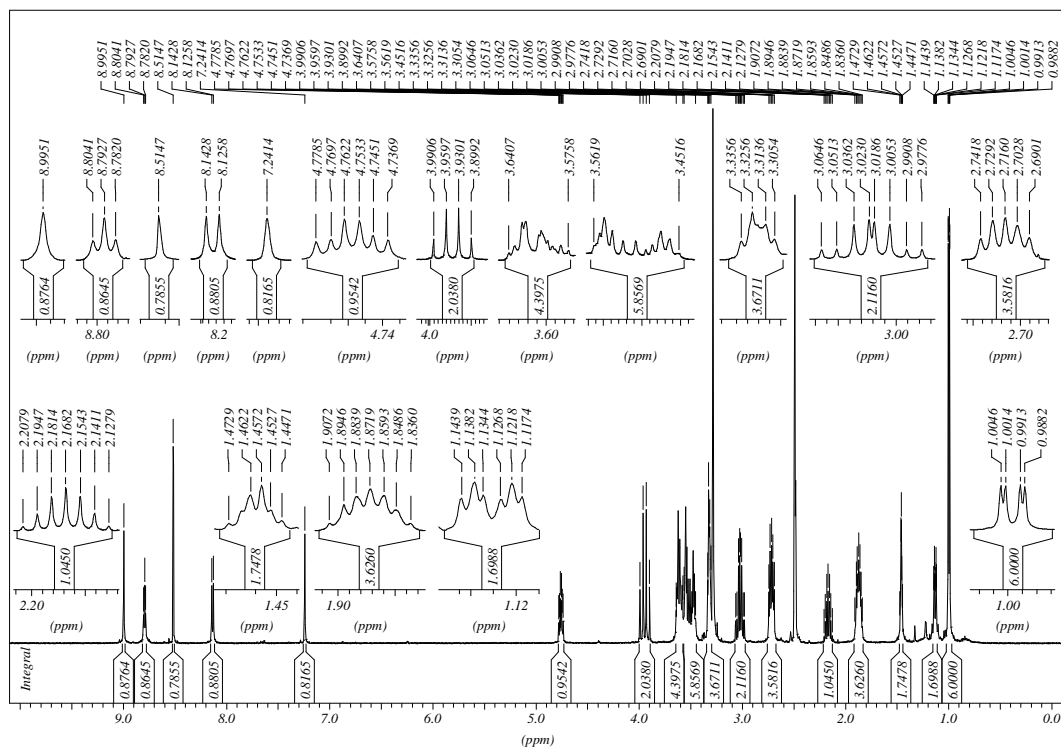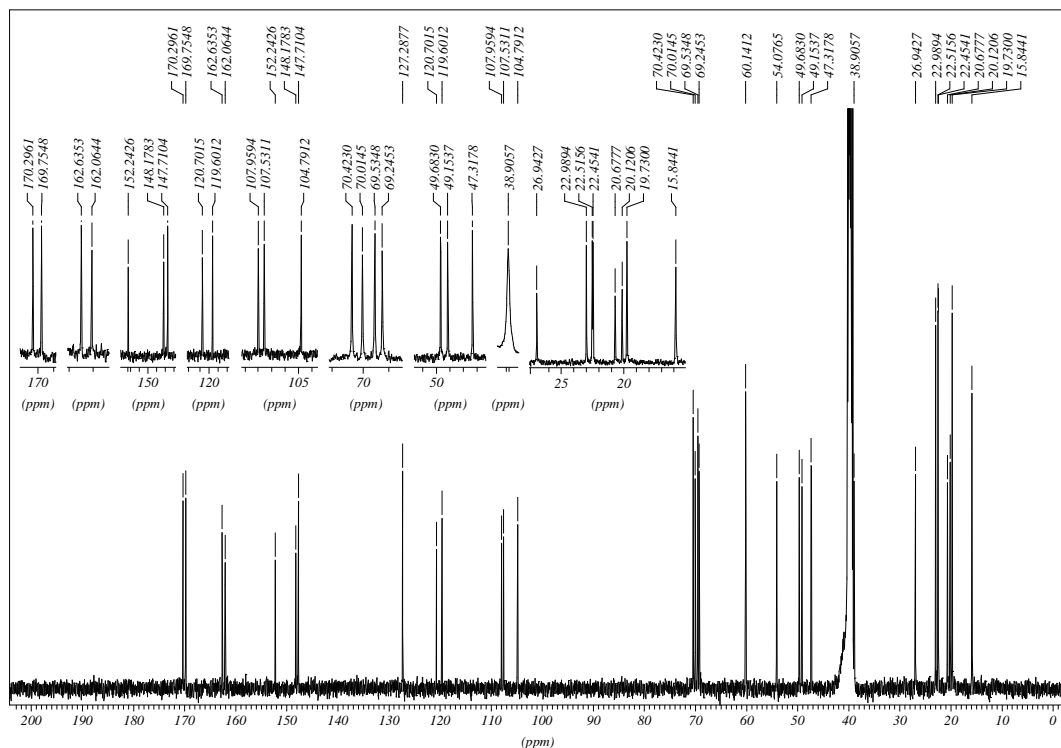

Supplement: c5ob01613d1.pdf [file c5ob01613d1.pdf]
